# Supplementary material
Source: publisher figshare collection journal article supplement (https://frontiersin.figshare.com/ndownloader/files/18039224)

Figure A1.

*Total and indirect effects of education on opposition to migration and % of foregin-born population.*

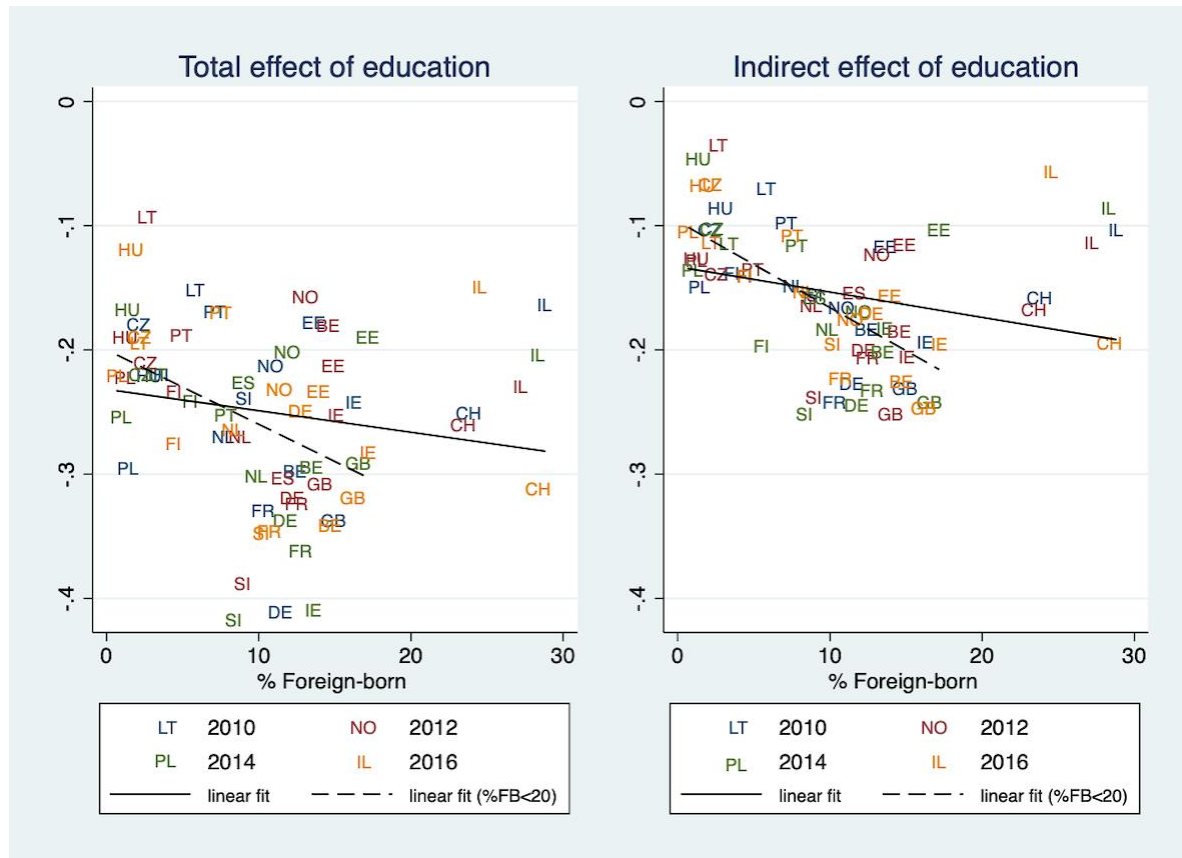

Supplement: Supplementary file [file 18039224]
